# Supplementary material
Source: PubMed Central journal article supplement (PMC10102919)
Supplement: jamaophthalmol-e230809-s001.pdf [file jamaophthalmol-e230809-s001.pdf]

## Supplementary Online Content

Bhatnagar A, Skrehot HC, Bhatt A, Herce H, Weng CY. Epidemiology of retinopathy of prematurity in the US from 2003 to 2019. *JAMA Ophthalmol*. Published online April 13, 2023. doi:10.1001/jamaophthalmol.2023.0809

**eTable 1.** *ICD-9* and *ICD-10* Codes for Patient Selection

**eTable 2.** Demographic Risk Factors for ROP Incidence (2003-2019)

**eFigure.** ROP Incidence Across Sexes Between 2003 to 2019

This supplementary material has been provided by the authors to give readers additional information about their work.

**eTable 1. ICD-9 and ICD-10 Codes for Patient Selection**

|                             | <b>ICD-9 Codes (2003-2012)</b>     | <b>ICD-10 Codes (2016-2019)</b> |
|-----------------------------|------------------------------------|---------------------------------|
| Newborn Births              | V30.X<br>V31.X<br>V34.X<br>V39.X   | Z38.X                           |
| Low Birth Weight (<1,500 g) | 765.01 - 765.05<br>765.11 - 765.15 | P07.0X<br>P07.14, P07.15        |
| Premature Birth Week        | 765.21 - 765.28                    | P07.2X, P07.3X                  |
| Retinopathy of Prematurity  | 362.20 - 362.27                    | H35.1X                          |

<sup>a</sup>ICD-9 = International Classification of Diseases codes, version 9. ICD-10 = International Classification of Diseases codes, version 10.

**eTable 2.** Demographic Risk Factors for ROP Incidence (2003-2019)

| Population                                     | ROP Patients        |         |
|------------------------------------------------|---------------------|---------|
|                                                | Odds Ratio (95% CI) | P-value |
| Database-Reported Gender                       |                     |         |
| Male                                           | Reference           | -       |
| Female                                         | 1.05 (1.03, 1.07)   | <0.001* |
| Database-Reported Race                         |                     |         |
| Asian/Pacific Islander                         | 0.88 (0.86, 0.90)   | <0.001* |
| Black                                          | 1.72 (1.70, 1.74)   | <0.001* |
| Hispanic                                       | 1.05 (1.03, 1.07)   | <0.001* |
| Native American                                | 0.83 (0.77, 0.89)   | <0.001* |
| White                                          | 0.77 (0.76, 0.78)   | <0.001* |
| Other                                          | 1.35 (1.31, 1.38)   | <0.001* |
| Region                                         |                     |         |
| Northeast                                      |                     |         |
| Urban                                          | Reference           | -       |
| Rural                                          | 0.35 (0.31, 0.39)   | <0.001* |
| Midwest                                        |                     |         |
| Urban                                          | 1.18 (1.16, 1.20)   | <0.001* |
| Rural                                          | 0.42 (0.39, 0.44)   | <0.001* |
| South                                          |                     |         |
| Urban                                          | 1.21 (1.20, 1.23)   | <0.001* |
| Rural                                          | 0.32 (0.31, 0.34)   | <0.001* |
| West                                           |                     |         |
| Urban                                          | 0.98 (0.97, 0.99)   | <0.001* |
| Rural                                          | 0.21 (0.18, 0.23)   | <0.001* |
| MHI quartile for patient zip code <sup>a</sup> |                     |         |
| 4th quartile                                   | Reference           | -       |
| 3rd quartile                                   | 1.23 (1.22, 1.25)   | <0.001* |
| 2nd quartile                                   | 1.31 (1.30, 1.33)   | <0.001* |
| 1st quartile                                   | 1.17 (1.16, 1.18)   | <0.001* |

<sup>a</sup> MHI = median household income

\* represents statistical significance with  $P \leq 0.05$

**eFigure.** ROP Incidence Across Sexes Between 2003 to 2019

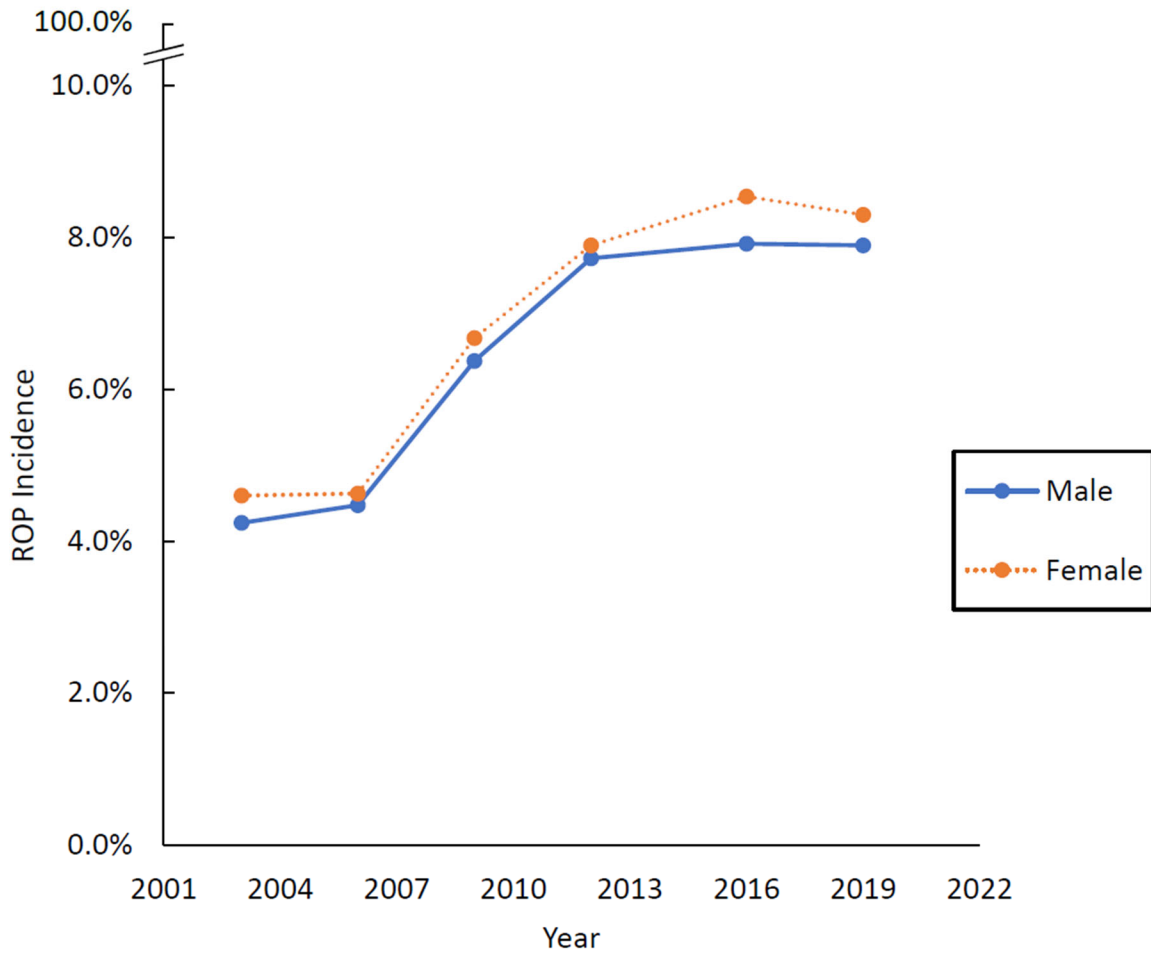

eFigure1 Legend: Males and females experienced similar increases in ROP incidence from 2003 to 2019; females consistently had slightly higher rates of ROP incidence compared with males.
