# Supplementary material
Source: PubMed Central journal article supplement (PMC10102919)
Supplement: jamaophthalmol-e230809-s002.pdf [file jamaophthalmol-e230809-s002.pdf]

## **Data Sharing Statement**

### **Data**

**Data available:** No

### **Additional Information**

**Explanation for why data not available:** This is a database study which is already publicly available.
